# Supplementary material for: A Genome-Wide Loss-of-Function Screen Identifies SLC26A2 as a Novel Mediator of TRAIL Resistance
Source: Oxford University Press journal article supplement (doi:10.1158/1541-7786.mcr-16-0234), 2017-01-20
Supplement: 15417786mcr160234-sup-166995_1_supp_3744949_6gpql1.xlsx [file 15417786mcr160234-sup-166995_1_supp_3744949_6gpql1.xlsx]

## Sheet: Sheet1
Supplemental Table 1: Significantly enriched pathways from GIANT analysis
			Pathways contain ErbB/EGFR signaling
Pathways/Processes/Diseases	Database	P-Value (FDR Corrected)
Chronic myeloid leukemia	KEGG	2.48e-09
ErbB signaling pathway	KEGG	1.51e-05
Proteoglycans in cancer	KEGG	0.000146
Bacterial invasion of epithelial cells	KEGG	0.000135
Jak-STAT signaling pathway	KEGG	0.000182
Transmembrane receptor protein tyrosine kinase signaling	Gene Ontology	0.000176
Cellular response to hormone stimulus	Gene Ontology	0.000367
Cellular response to organonitrogen compound	Gene Ontology	0.000505
Cellular response to peptide hormone stimulus	Gene Ontology	0.000483
Neurotrophin signaling pathway	KEGG	0.000519
Cellular response to peptide	Gene Ontology	0.000494
Response to peptide hormone	Gene Ontology	0.000521
Response to peptide	Gene Ontology	0.000628
Cellular response to nitrogen compound	Gene Ontology	0.00059
Renal cell carcinoma - Homo sapiens (human)	KEGG	0.000699
Insulin signaling pathway	KEGG	0.000712
Response to organonitrogen compound	Gene Ontology	0.000793
Response to hormone	Gene Ontology	0.000968
Enzyme linked receptor protein signaling pathway	Gene Ontology	0.00105
Cellular response to endogenous stimulus	Gene Ontology	0.00125
Response to nitrogen compound	Gene Ontology	0.00137
Positive regulation of cellular response to insulin stimulus	Gene Ontology	0.00226
Neurotrophin signaling pathway	Gene Ontology	0.00216
Focal adhesion	KEGG	0.00291
Cellular response to insulin stimulus	Gene Ontology	0.00301
Response to insulin	Gene Ontology	0.00383
Phosphatidylinositol-mediated signaling	Gene Ontology	0.00505
Inositol lipid-mediated signaling	Gene Ontology	0.00487
Cellular response to oxygen-containing compound	Gene Ontology	0.00483
Cellular response to growth hormone stimulus	Gene Ontology	0.00493
Growth hormone receptor signaling pathway	Gene Ontology	0.00478
Response to growth hormone	Gene Ontology	0.00565
MicroRNAs in cancer	KEGG	0.0114
Regulation of cellular response to insulin stimulus	Gene Ontology	0.0115
Cellular response to growth factor stimulus	Gene Ontology	0.0113
Response to growth factor	Gene Ontology	0.0133
Insulin receptor signaling pathway	Gene Ontology	0.0221
Viral carcinogenesis - Homo sapiens (human)	KEGG	0.0222
Rap1 signaling pathway	KEGG	0.0244
Regulation of actin cytoskeleton	KEGG	0.0247
T cell receptor signaling pathway	KEGG	0.0283
Ras signaling pathway	KEGG	0.0287
Leukocyte transendothelial migration	KEGG	0.0387
Immune system cancer	OMIM	0.0453
Hematologic cancer	OMIM	0.0443
