# Supplementary material for: A Genome-Wide Loss-of-Function Screen Identifies SLC26A2 as a Novel Mediator of TRAIL Resistance
Source: Oxford University Press journal article supplement (doi:10.1158/1541-7786.mcr-16-0234), 2017-01-20
Supplement: 15417786mcr160234-sup-166995_1_supp_3744950_1gpql1.xlsx [file 15417786mcr160234-sup-166995_1_supp_3744950_1gpql1.xlsx]

## Sheet: Sheet1
Supplemental Table 2: GSEA analysis for upregualted (enriched) pathways in TRAIL treated BJAB-LEXR vs. BJAB WT
						Pathways contain ErbB/EGFR signaling
NAME	KEGG PATHWAYS	SIZE	NES	NOM p-val
HSA00280	Valine, leucine and isoleucine degradation	43	2.48037	0
HSA04120	Ubiquitin mediated proteolysis	132	2.46951	0
HSA03018	RNA degradation	56	2.40554	0
HSA00970	Aminoacyl-tRNA biosynthesis	40	2.31906	0
HSA00640	Propanoate metabolism	31	2.30287	0
HSA05212	Pancreatic cancer	69	2.29727	0
HSA04114	Oocyte meiosis	110	2.19608	0
HSA00071	Fatty acid metabolism	40	2.17535	0
HSA03420	Nucleotide excision repair	43	2.14128	0
HSA05110	Vibrio cholerae infection	52	2.12997	0
HSA04914	Progesterone-mediated oocyte maturation	84	2.11791	0
HSA04141	Protein processing in endoplasmic reticulum	162	2.10654	0
HSA04130	SNARE interactions in vesicular transport	35	2.10618	0
HSA03060	Protein export	22	2.07103	0
HSA00520	Amino sugar and nucleotide sugar metabolism	44	2.05078	0
HSA04110	Cell cycle	116	2.04275	0
HSA00020	Citrate cycle (TCA cycle)	29	2.02944	0
HSA05131	Shigellosis	60	2.02457	0
HSA05220	Chronic myeloid leukemia	72	2.02293	0
HSA05100	Bacterial invasion of epithelial cells	67	2.01754	0
HSA04664	Fc epsilon RI signaling pathway	77	2.00859	0
HSA00190	Oxidative phosphorylation	122	2.00799	0
HSA00650	Butanoate metabolism	28	2.00667	0
HSA04142	Lysosome	120	1.99813	0
HSA03050	Proteasome	43	1.998	0
HSA05211	Renal cell carcinoma	69	1.99066	0
HSA04146	Peroxisome	76	1.9817	0
HSA03430	Mismatch repair	22	1.93948	0
HSA04210	Apoptosis	86	1.93652	0
HSA03040	Spliceosome	125	1.93102	0
HSA03022	Basal transcription factors	33	1.9267	0.0031348
HSA03020	RNA polymerase	28	1.9193	0
HSA00240	Pyrimidine metabolism	96	1.86888	0
HSA00900	Terpenoid backbone biosynthesis	14	1.86081	0.00352113
HSA04662	B cell receptor signaling pathway	74	1.85821	0
HSA04722	Neurotrophin signaling pathway	125	1.85491	0
HSA00510	N-Glycan biosynthesis	47	1.85414	0
HSA04660	T cell receptor signaling pathway	107	1.85282	0
HSA03030	DNA replication	35	1.82316	0
HSA04666	Fc gamma R-mediated phagocytosis	92	1.80672	0
HSA05223	Non-small cell lung cancer	53	1.8048	0.00307692
HSA01040	Biosynthesis of unsaturated fatty acids	20	1.79261	0.00946372
HSA05214	Glioma	64	1.79227	0.00308642
HSA00563	Glycosylphosphatidylinositol(GPI)-anchor biosynthesis	24	1.79128	0.00682594
HSA00100	Steroid biosynthesis	16	1.7802	0.0035461
HSA05221	Acute myeloid leukemia	56	1.77928	0
HSA05213	Endometrial cancer	51	1.75818	0
HSA00030	Pentose phosphate pathway	25	1.75689	0
HSA04070	Phosphatidylinositol signaling system	77	1.75614	0.00290698
HSA00290	Valine, leucine and isoleucine biosynthesis	10	1.75119	0.00704225
HSA00620	Pyruvate metabolism	39	1.72629	0
HSA00230	Purine metabolism	157	1.72555	0
HSA05222	Small cell lung cancer	83	1.71532	0.00287356
HSA00270	Cysteine and methionine metabolism	33	1.71311	0.00986842
HSA04910	Insulin signaling pathway	135	1.67657	0
HSA00562	Inositol phosphate metabolism	56	1.6751	0
HSA00310	Lysine degradation	43	1.67477	0.00632911
HSA05120	Epithelial cell signaling in Helicobacter pylori infection	66	1.66958	0.00311526
HSA04012	ErbB signaling pathway	86	1.6593	0
HSA03440	Homologous recombination	27	1.65692	0.0219436
HSA04370	VEGF signaling pathway	74	1.63814	0.00584795
HSA00670	One carbon pool by folate	17	1.60892	0.0433333
HSA04670	Leukocyte transendothelial migration	115	1.60877	0.00564972
HSA04966	Collecting duct acid secretion	25	1.60009	0.03
HSA04510	Focal adhesion	197	1.59058	0
HSA04810	Regulation of actin cytoskeleton	209	1.58465	0
HSA00250	Alanine, aspartate and glutamate metabolism	31	1.58418	0.0128205
HSA05210	Colorectal cancer	61	1.58386	0.0182371
HSA04520	Adherens junction	72	1.58236	0.00315457
HSA05012	Parkinson's disease	119	1.58074	0
HSA00010	Glycolysis / Gluconeogenesis	63	1.57828	0.00967742
HSA00052	Galactose metabolism	24	1.57355	0.0318021
HSA00561	Glycerolipid metabolism	48	1.57296	0.019544
HSA04960	Aldosterone-regulated sodium reabsorption	40	1.56757	0.0252366
HSA05215	Prostate cancer	87	1.54702	0.00903614
HSA00051	Fructose and mannose metabolism	33	1.54597	0.0380952
HSA05130	Pathogenic Escherichia coli infection	55	1.5453	0.0122324
HSA03450	Non-homologous end-joining	12	1.53372	0.0454545
HSA04144	Endocytosis	200	1.53052	0
HSA04145	Phagosome	148	1.52082	0.00837989
HSA04620	Toll-like receptor signaling pathway	99	1.52034	0.00826446
HSA04150	mTOR signaling pathway	50	1.51751	0.0192926
HSA04962	Vasopressin-regulated water reabsorption	43	1.50596	0.02589
HSA04320	Dorso-ventral axis formation	23	1.50392	0.0338983
HSA05010	Alzheimer's disease	159	1.49904	0.00557103
HSA05016	Huntington's disease	175	1.48916	0.00543478
HSA04614	Renin-angiotensin system	16	1.47758	0.0536913
HSA00564	Glycerophospholipid metabolism	76	1.47648	0.0295858
HSA00380	Tryptophan metabolism	39	1.45519	0.0316456
